# Supplementary material for: Edge-Termination and Core-Modification Effects of Hexagonal Nanosheet Graphene
Source: MDPI journal article supplement (doi:10.3390/molecules19022361), 2014-02-21

## Supplementary Materials

Calculated HOMO and LUMO for original HGNS (AC6 and AC4), defect HGNS (AC4-d6 and AC6-d6), and epoxy-HGNS for core and edge (AC4-epoxy core and edge) which indicated the electron density HGNS.

|        | HOMO                                                                                | LUMO                                                                                 |
|--------|-------------------------------------------------------------------------------------|--------------------------------------------------------------------------------------|
| AC6    | 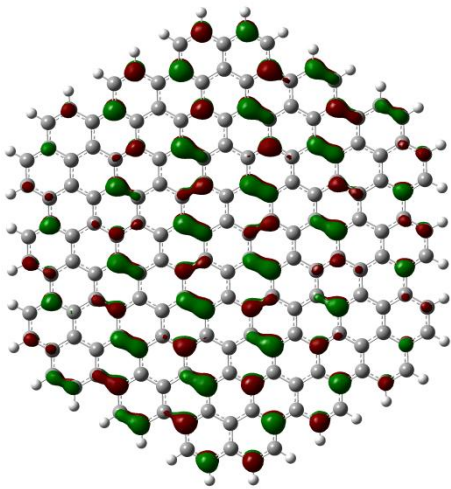   |    |
| AC6-d6 |  |   |
| AC4    |  |  |

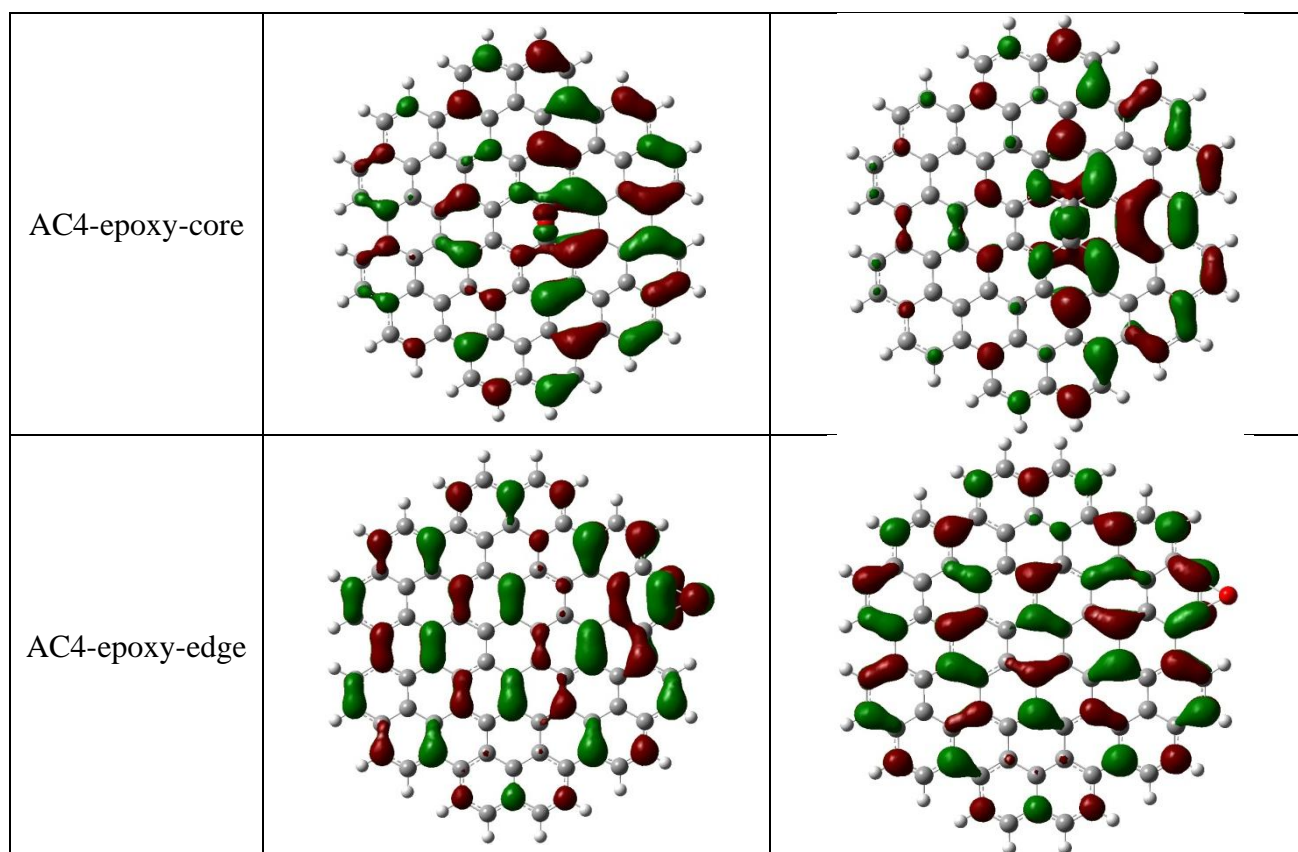

Supplement: s1 [file s1]
